# Supplementary material
Source: HighWire-hosted journal article supplement (https://bmjopen.bmj.com/content/15/2/e093905)
Supplement: inline-supplementary-material-1 [file inline-supplementary-material-1.pdf]

Table S1. Gene lists included in next-generation sequencing (NGS) hereditary cancer panel

| Panel                              | Updated date | Genes                                                                                                                                                                                                                                                                                                                                                                                                                                                                                        |
|------------------------------------|--------------|----------------------------------------------------------------------------------------------------------------------------------------------------------------------------------------------------------------------------------------------------------------------------------------------------------------------------------------------------------------------------------------------------------------------------------------------------------------------------------------------|
| Hereditary NGS panel<br>(23 genes) | 2018.02      | APC, ATM, BARD1, BRCA1, BRCA2, BRIP1, CDH1, CHEK2, EPCAM, MEN1, MLH1, MSH2, MSH6, MUTYH, NBN, PALB2, PMS2, PTEN, RAD50, RAD51C, RET, STK11, TP53                                                                                                                                                                                                                                                                                                                                             |
| Hereditary NGS panel<br>(25 genes) | 2018.10      | APC, ATM, BARD1, BRCA1, BRCA2, BRIP1, CDH1, CHEK2, EPCAM, MEN1, MLH1, MSH2, MSH6, MUTYH, NBN, PALB2, PMS2, PTEN, RAD50, RAD51C, RET, STK11, TP53, NF1, RAD51D                                                                                                                                                                                                                                                                                                                                |
| Hereditary NGS panel<br>(28 genes) | 2019.11      | APC, ATM, BARD1, BRCA1, BRCA2, BRIP1, CDH1, CHEK2, EPCAM, MEN1, MLH1, MSH2, MSH6, MUTYH, NBN, PALB2, PMS2, PTEN, RAD50, RAD51C, RET, STK11, TP53, NF1, RAD51D, POLD1, POLE, SMAD4                                                                                                                                                                                                                                                                                                            |
| Hereditary NGS panel<br>(73 genes) | 2022.02      | APC, ATM, BARD1, BRCA1, BRCA2, BRIP1, CDH1, CHEK2, EPCAM, MEN1, MLH1, MSH2, MSH6, MUTYH, NBN, PALB2, PMS2, PTEN, RAD50, RAD51C, RET, STK11, TP53, NF1, RAD51D, POLD1, POLE, SMAD4, BMPR1A, CDKN2A, FH, HRAS, MAX, MET, MRE11, NF2, RB1, SDHA, SDHAF2, SDHB, SDHC, SDHD, TMEM127, TSC1, TSC2, VHL, WT1, AIP, AXIN2, BAP1, CDC73, CDK12, CDK4, CDKN1B, CHEK1, CTNNA1, DICER1, EXT1, EXT2, FANCL, FLCN, GREM1, HOXB13, KIT, MSH3, NTHL1, PPP2R2A, PTCH1, RAD51B, RAD54L, SMARCA4, SMARCB1, SUFU |

\*Abbreviation: NGS, next-generation sequencing

Table S2. Comparative Guidelines for Screening and Managing BRCA Gene Mutations: Korea, US, and UK

| Guidelines                                            | Country | Breast cancer                                                                                                                                                                                                                                                                                                                                                                                                                                                                                                                                                                                                                                                                                                                                                          | Ovarian cancer                                                                                                                                                                                                                                                                                                                                                                                                                                                                                                                                                                                                             | Other cancers                                                                                                                                                                                                                                                                                                                                                                                                                                                                                                                                                                                                                                                                                                                                                                                                                                                                                              | Ref  |
|-------------------------------------------------------|---------|------------------------------------------------------------------------------------------------------------------------------------------------------------------------------------------------------------------------------------------------------------------------------------------------------------------------------------------------------------------------------------------------------------------------------------------------------------------------------------------------------------------------------------------------------------------------------------------------------------------------------------------------------------------------------------------------------------------------------------------------------------------------|----------------------------------------------------------------------------------------------------------------------------------------------------------------------------------------------------------------------------------------------------------------------------------------------------------------------------------------------------------------------------------------------------------------------------------------------------------------------------------------------------------------------------------------------------------------------------------------------------------------------------|------------------------------------------------------------------------------------------------------------------------------------------------------------------------------------------------------------------------------------------------------------------------------------------------------------------------------------------------------------------------------------------------------------------------------------------------------------------------------------------------------------------------------------------------------------------------------------------------------------------------------------------------------------------------------------------------------------------------------------------------------------------------------------------------------------------------------------------------------------------------------------------------------------|------|
| 10th Korean Breast Cancer Treatment Guidelines (2023) | Korea   | <p><u>Female carriers</u></p> <ul style="list-style-type: none"><li>-Self-examination education from age 18.</li><li>-Clinical breast examination every 6 months starting at age 25.</li><li>-Annual MRI screening from age 25-29.</li><li>-Annual MMG and MRI from age 30-75.</li></ul> <p><u>Male carriers</u></p> <ul style="list-style-type: none"><li>-Monthly self-examination and clinical breast examination every 12 months starting at age 35</li><li>-Annual MMG from age 50 for men with gynecomastia.</li></ul> <p><u>Management</u></p> <ul style="list-style-type: none"><li>-Bilateral RRM may be considered for BRCA1/2 carriers.</li><li>-Contralateral mastectomy may be considered in carriers diagnosed with breast cancer.</li></ul>             | <p><u>Screening</u></p> <ul style="list-style-type: none"><li>-Transvaginal ultrasound and CA125 blood test every 6 months starting at age 30.</li><li>-Ultrasound is recommended between days 1-10 of the menstrual cycle; CA125 after day 5.</li></ul> <p><u>Management</u></p> <ul style="list-style-type: none"><li>-RRSO is recommended for BRCA1/2 carriers to lower ovarian and breast cancer risk.</li><li>-RRSO is recommended at age 35-40 after family planning is complete.</li><li>-Timing of RRSO should be individualized based on patient discussions.</li></ul>                                           | <p><b>Prostate Cancer</b></p> <ul style="list-style-type: none"><li>-DRE and PSA blood test for early detection of prostate cancer from age 18.</li><li>-Follow-up prostate cancer screening is recommended for <i>BRCA2</i> carriers.</li></ul> <p><b>Pancreatic Cancer</b></p> <ul style="list-style-type: none"><li>-Initial screening with EUS, followed by alternating EUS and contrast-enhanced pancreatic MRI/MRCP, or annual MRI.</li></ul> <p><b>Gastric Cancer</b></p> <ul style="list-style-type: none"><li>-Endoscopy every 2 years starting at age 40, or 10 years earlier than the earliest age of onset in the family if there is a family history.</li></ul> <p><b>Colorectal Cancer</b></p> <ul style="list-style-type: none"><li>-Colonoscopy every 5 years starting at age 40, or 10 years earlier than the earliest age of onset in the family if there is a family history.</li></ul> | [40] |
| NCCN (2024)                                           | US      | <p><u>Female carriers</u></p> <ul style="list-style-type: none"><li>-Breast awareness from age 18.</li><li>-Clinical breast examination every 6-12 months starting at age 25.</li><li>-Annual MRI screening from age 25-29 (MMG if MRI unavailable).</li><li>-Annual MMG and MRI from age 30-75.</li><li>-Individualized management after age 75.</li></ul> <p><u>Male carriers</u></p> <ul style="list-style-type: none"><li>-Breast self-exam training and annual clinical breast examination starting at age 35</li><li>- Annual MMG from age 50 or earlier depending on family history.</li></ul> <p><u>Management</u></p> <ul style="list-style-type: none"><li>- RRM may be considered based on age, life expectancy, and residual breast cancer risk.</li></ul> | <p><u>Screening</u></p> <ul style="list-style-type: none"><li>-Undescribed</li></ul> <p><u>Management</u></p> <ul style="list-style-type: none"><li>-BRCA1 carriers: RRSO recommended at age 35-40.</li><li>-BRCA2 carriers: RRSO can be delayed to age 40-45 unless family history suggests earlier intervention.</li><li>-Pre-surgical CA125 testing and pelvic ultrasound recommended.</li><li>-Combined OCP or hormonal IUDs can be considered to reduce ovarian cancer risk for women retaining their ovaries.</li><li>-HRT may be considered post-RRSO, tailored to the presence or absence of the uterus.</li></ul> | <p><b>Prostate Cancer</b></p> <ul style="list-style-type: none"><li>-Screening should begin at age 40.</li><li>-Screening may be considered for <i>BRCA1</i> PV/LPV carriers.</li><li>-Screening is recommended for <i>BRCA2</i> PV/LPV carriers.</li></ul> <p><b>Pancreatic Cancer</b></p> <ul style="list-style-type: none"><li>-Screening for pancreatic cancer should be considered starting at age 50, or 10 years earlier than the earliest diagnosis of exocrine pancreatic cancer in a first- or second-degree relative with a germline PV/LPV, whichever comes first.</li><li>-For individuals without a family history of exocrine pancreatic cancer, pancreatic cancer screening is not recommended for PV/LPV carriers in genes other than <i>ATM</i>, <i>BRCA2</i>, <i>STK11</i>, and <i>CDKN2A</i>.</li></ul>                                                                                | [41] |

|                        |    |                                                                                                                                                                                                                                                                                                                                                                                                                                                                                                                                                                                                                 |                                                                                                                                                                                                                                                                                                                                                                                                                                                                                                                                              |                                                                                                                                                                                                                         |      |
|------------------------|----|-----------------------------------------------------------------------------------------------------------------------------------------------------------------------------------------------------------------------------------------------------------------------------------------------------------------------------------------------------------------------------------------------------------------------------------------------------------------------------------------------------------------------------------------------------------------------------------------------------------------|----------------------------------------------------------------------------------------------------------------------------------------------------------------------------------------------------------------------------------------------------------------------------------------------------------------------------------------------------------------------------------------------------------------------------------------------------------------------------------------------------------------------------------------------|-------------------------------------------------------------------------------------------------------------------------------------------------------------------------------------------------------------------------|------|
|                        |    |                                                                                                                                                                                                                                                                                                                                                                                                                                                                                                                                                                                                                 |                                                                                                                                                                                                                                                                                                                                                                                                                                                                                                                                              | <b>Melanoma</b><br>- There are no specific guidelines for melanoma; however, annual full-body skin examinations are recommended.<br>- General melanoma risk management, such as minimizing UV exposure, is appropriate. |      |
| NICE<br>(updated 2023) | UK | <u>Female carriers</u><br>-MRI and MMG not recommended from age 20-29.<br>-Annual MRI and consider annual MMG from age 30-39.<br>-Annual MRI and MMG from age 40-49.<br>-Annual MMG from age 50-59 (MRI only for dense breasts).<br>-Annual MMG from age 60-69 (MRI only for dense breasts).<br>-MMG as part of the population screening program after 70.<br><br><u>Male carriers</u><br>-Undescribed<br><br><u>Management</u><br>-RRM available for <i>BRCA1</i> carriers, with detailed counseling on benefits and risks. Immediate or delayed breast reconstruction should be offered by specialized teams. | <u>Screening</u><br>- Serial CA125 testing every 4 months using validated algorithms<br>- Annual consultations to discuss results and risk-reducing surgery.<br><br><u>Management</u><br>- <i>BRCA1</i> carriers: RRSO recommended after age 35.<br>- <i>BRCA2</i> carriers: RRSO recommended after age 40.<br>- Surgery should occur after family planning is complete.<br>- Comprehensive discussion of benefits and risks is required. Surgery is not recommended for patients with significant comorbidities or limited life expectancy. | <b>Not Applicable</b>                                                                                                                                                                                                   | [42] |

\* CA125: Cancer Antigen 125; DRE: Digital Rectal Examination; EUS: Endoscopic Ultrasound; LPV: Likely Pathogenic Variant; MMG: Mammogram; MRCP: Magnetic Resonance Cholangiopancreatography; MRI: Magnetic Resonance Imaging; NCCN: National Comprehensive Cancer Network; NICE: National Institute for Health and Care Excellence; OCP: Oral Contraceptives PV: Pathogenic Variant; RRM: Risk-Reducing Mastectomy; RRSO: Risk-Reducing Salpingo-Oophorectomy; UV: Ultraviolet
